# Supplementary material for: Analysis of Salinity Tolerance in Tomato Introgression Lines Based on Morpho-Physiological and Molecular Traits
Source: MDPI journal article supplement (doi:10.3390/plants10122594), 2021-11-26
Supplement: s1 [file s1]

**Table S1.** Analysis of variance (ANOVA) (mean square) for morpho-physiological traits in six tomato genotypes at the vegetative stage under control (C) and salt stress (S) with 120mM NaCl conditions.

| SOV              | df | LN      | SD<br>(mm) | SL (cm)   | RL (cm)  | SFW (g)  | SDW<br>(g) | RFW<br>(g) | RDW<br>(g) | Chl.a<br>(mg /<br>cm <sup>2</sup> ) | Chl.b<br>(mg<br>/cm <sup>2</sup> ) | Na+<br>(mg/g<br>DW) | K+<br>(mg/g<br>DW) |
|------------------|----|---------|------------|-----------|----------|----------|------------|------------|------------|-------------------------------------|------------------------------------|---------------------|--------------------|
| Genotypes<br>(G) | 5  | 27.78** | 6.37**     | 333.91**  | 306.24** | 264.31** | 1.13**     | 28.53**    | 0.02**     | 35.62**                             | 5.04**                             | 10.31**             | 1.21**             |
| Treatment<br>(T) | 1  | 78.03** | 1.25**     | 6045.06** | 58.78**  | 466.56** | 0.93**     | 1.42**     | 0.00       | 39.92**                             | 5.74**                             | 136.77**            | 285.44**           |
| G X T            | 5  | 2.89**  | 1.21**     | 269.20**  | 114.98** | 18.58**  | 0.17**     | 2.43**     | 0.00       | 2.57**                              | 0.60**                             | 8.46**              | 2.99**             |
| Error            | 24 |         |            |           |          |          |            |            |            |                                     |                                    |                     |                    |

leaf number (LN), stem diameter (SD), shoot length (SL), root length (RL), shoot fresh weight (SFW), shoot dry weight (SDW), root fresh weight (RFW), root dry weight (RDW), chlorophyll a (Chl<sub>a</sub>), chlorophyll b (Chl<sub>b</sub>), Sodium leaves content (Na<sup>+</sup>), potassium leaves content (K<sup>+</sup>). Df, degree of freedom. \*\* significant at 1% level of significance.

**Table S2.** PCA of six tomato genotypes, Eigenvalues, proportion, and cumulative variance for the first four Principal components for salt tolerance indices (S/C) of twelve growth traits.

|                 | PCA1         | PCA2         | PCA3   | PCA4   |
|-----------------|--------------|--------------|--------|--------|
| Eigenvalue      | 8.050        | 1.728        | 1.457  | 0.689  |
| Variability (%) | 67.080       | 14.402       | 12.144 | 5.739  |
| Cumulative %    | 67.080       | 81.482       | 93.626 | 99.364 |
| LN              | <b>0.853</b> | 0.146        | 0.000  | 0.001  |
| SL              | <b>0.811</b> | 0.087        | 0.065  | 0.003  |
| SD              | <b>0.817</b> | 0.037        | 0.005  | 0.140  |
| SFW             | <b>0.964</b> | 0.004        | 0.021  | 0.002  |
| SDW             | <b>0.910</b> | 0.001        | 0.050  | 0.039  |
| RL              | <b>0.591</b> | 0.119        | 0.065  | 0.217  |
| RFW             | <b>0.700</b> | 0.013        | 0.196  | 0.091  |
| RDW             | <b>0.921</b> | 0.000        | 0.078  | 0.001  |
| Chl.a           | <b>0.516</b> | 0.043        | 0.374  | 0.067  |
| Chl.b           | <b>0.483</b> | 0.054        | 0.456  | 0.006  |
| Na <sup>+</sup> | 0.449        | <b>0.491</b> | 0.045  | 0.005  |
| K <sup>+</sup>  | 0.035        | <b>0.734</b> | 0.102  | 0.118  |

Values  $\geq 0.48$  are presented in bold-face and indicate traits important for PC. leaves number (LN), shoot length (SL), stem diameter (SD), shoot fresh weight (SFW), shoot dry weight (SDW), root length (RL), root fresh weight (RFW), root dry weight (RDW), chlorophyll a (Chl<sub>a</sub>), chlorophyll b (Chl<sub>b</sub>), Sodium leaves content (Na<sup>+</sup>), potassium leaves content (K<sup>+</sup>).

**Table S3.** Phenotypic correlation coefficients (r) values of the different pairs of estimated growth parameters of six tomato under non-saline and saline irrigation (120 mM) into hydroponic growing system.

| Variables | LN           | SL           | SD           | SFW          | SDW          | RL            | RFW          | RDW          | Chl. A   | Chl. B   | Na+      | K+       |
|-----------|--------------|--------------|--------------|--------------|--------------|---------------|--------------|--------------|----------|----------|----------|----------|
| LN        | <b>1</b>     |              |              |              |              |               |              |              |          |          |          |          |
| SL        | 0.725        | <b>1</b>     |              |              |              |               |              |              |          |          |          |          |
| SD        | <b>0.899</b> | 0.798        | <b>1</b>     |              |              |               |              |              |          |          |          |          |
| SFW       | <b>0.931</b> | <b>0.885</b> | <b>0.925</b> | <b>1</b>     |              |               |              |              |          |          |          |          |
| SDW       | <b>0.900</b> | <b>0.899</b> | 0.810        | <b>0.962</b> | <b>1</b>     |               |              |              |          |          |          |          |
| RL        | -0.586       | -0.688       | -0.434       | -0.684       | -0.758       | <b>1</b>      |              |              |          |          |          |          |
| RFW       | 0.715        | 0.685        | <b>0.814</b> | 0.764        | 0.636        | -0.656        | <b>1</b>     |              |          |          |          |          |
| RDW       | <b>0.886</b> | 0.798        | <b>0.859</b> | <b>0.901</b> | <b>0.848</b> | -0.790        | <b>0.933</b> | <b>1</b>     |          |          |          |          |
| Chl. A    | 0.599        | <b>0.853</b> | 0.558        | 0.768        | <b>0.868</b> | -0.587        | 0.275        | 0.511        | <b>1</b> |          |          |          |
| Chl. B    | 0.548        | 0.523        | 0.505        | 0.564        | 0.521        | <b>-0.822</b> | <b>0.882</b> | <b>0.852</b> | 0.156    | <b>1</b> |          |          |
| Na+       | <b>0.885</b> | 0.436        | 0.782        | 0.748        | 0.691        | -0.194        | 0.411        | 0.589        | 0.446    | 0.152    | <b>1</b> |          |
| K+        | -0.163       | 0.499        | 0.153        | 0.197        | 0.158        | -0.208        | 0.216        | 0.089        | 0.416    | 0.083    | -0.372   | <b>1</b> |

Values in bold are different from 0 with a significance level  $\alpha=0.05$ . leaves number (LN), shoot length (SL), stem diameter (SD), shoot fresh weight (SFW), shoot dry weight (SDW), root length (RL), root fresh weight (RFW), root dry weight (RDW), chlorophyll a (Chl<sub>a</sub>), chlorophyll b (Chl<sub>b</sub>), Sodium leaves content (Na<sup>+</sup>), potassium leaves content (K<sup>+</sup>).

Table S4. Primers for gene expression analysis in tomato used in qPCR reactions.

| No | Primers    | Sequence 5'-3'               | Reference           |
|----|------------|------------------------------|---------------------|
| 1  | SISOS1-F   | TCGAGTGATGATTCTGGTGG'        | Huertas et al. [78] |
| 2  | SISOS1-R   | ATCACAGTGTGGAAAGGCT'         |                     |
| 3  | SISOS2-F   | CTGCTTAGGACAAGGACTCG'        | Huertas et al. [78] |
| 4  | SISOS2-R   | GGTATAGTGTGTGTAACCTGC3'      |                     |
| 5  | SISOS3-F   | GCAACGGAGTGATTGGATTTG        | Qi et al., [23]     |
| 6  | SISOS3-R   | CCATCTCTTTCAGCTCTTCTCTC      |                     |
| 7  | LeNHX2-F   | CCTTTGAGGGGAACAATGG'         | Huertas et al. [78] |
| 8  | LeNHX2-R   | CATCTTCATCTTCGTCTCC'         |                     |
| 9  | LeNHX4-F   | TGGTGGGCAGGTTTGATGAGAG       | Huertas et al. [78] |
| 10 | LeNHX4-R   | TGTGGTGGCAGCAGGAGACTTA       |                     |
| 11 | SIHKT1.1-F | TCTAGCCCAAGAACTCAAAT         | Asins et al. [89]   |
| 12 | SIHKT1.1-R | CTAATGTTACAACCTCCAAGGAATT    |                     |
| 13 | SIHKT1.2-F | TGAGCTAGGGAATGTAATAAACG      | Asins et al. [89]   |
| 14 | SIHKT1.2-R | AGAGAGAACTAACGATGAACC        |                     |
| 15 | SIERF4-F   | ACAGATCCATTTACGCATAAGAGAGTCC | Liu et al. [90]     |
| 16 | SIERF4-R   | GCTGAATATGATCGCAATTCTTCTTCAG |                     |
| 17 | SlActin-F  | TTGCTGACCGTATGAGCAAG         | Qi et al., [23]     |
| 18 | SlActin-R  | GGACAATGGATGGACCAGAC         |                     |

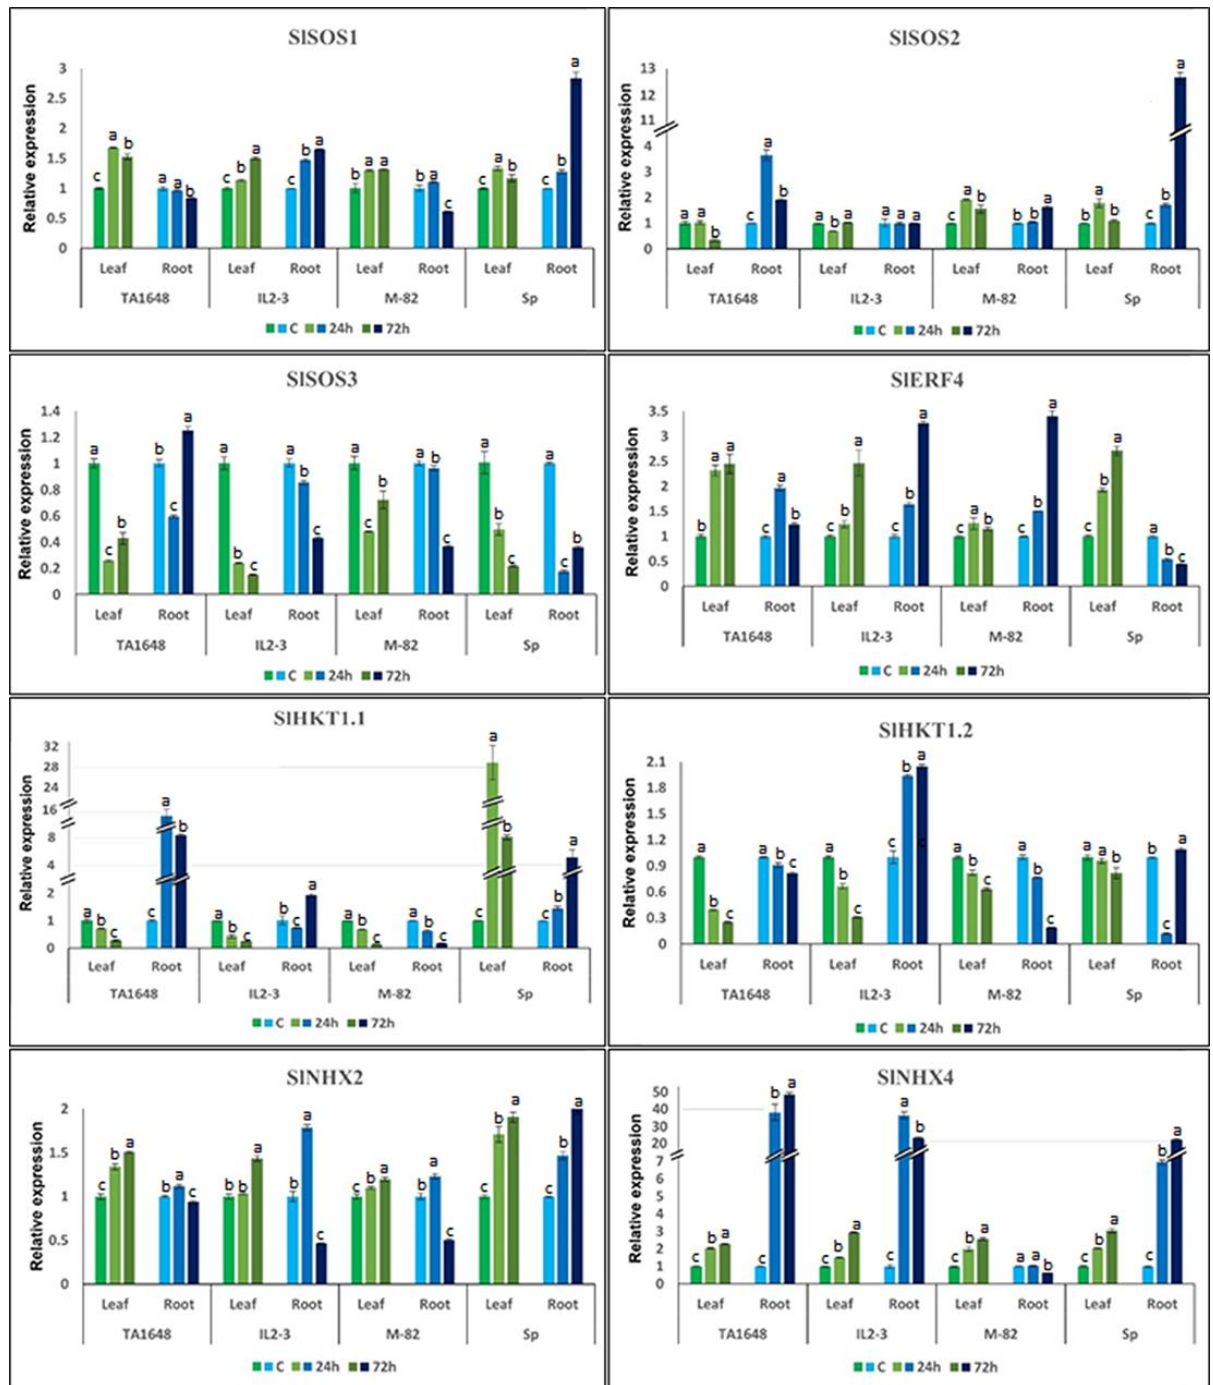

**Figure S1.** Expression profiles of eight salt stress-related genes in tomato ILs and its relative parents in response to 120mM NaCl after 24 and 72 hours of treatment. Data from qRT-PCR experiments were analyzed according to the  $2^{-\Delta\Delta C_t}$  method. The housekeeping actin gene was used as an internal reference control to normalize the expression levels of the target genes. Vertical bars indicate standard deviation calculated from three replicates. Values are mean  $\pm$  SD. (n = 3) at p < 0.05.
